# Supplementary material for: Microbial Diversity and Characteristic Quality Formation of Qingzhuan Tea as Revealed by Metagenomic and Metabolomic Analysis during Pile Fermentation
Source: MDPI journal article supplement (doi:10.3390/foods12193537), 2023-09-22
Supplement: s1 [file s1]

**Table S1.** The gradient elution conditions of liquid chromatography and mass spectrometry.

| Time(min) | Flow (mL/min) | A% (water+0.1%formic acid) | B% ( acetonitrile + 0.1% formic acid) |
|-----------|---------------|----------------------------|---------------------------------------|
| 0         | 0.3           | 95                         | 5                                     |
| 2         | 0.3           | 60                         | 40                                    |
| 7         | 0.3           | 20                         | 80                                    |
| 11        | 0.3           | 5                          | 95                                    |
| 15        | 0.3           | 5                          | 95                                    |
| 15.5      | 0.3           | 95                         | 5                                     |
| 20        | 0.3           | 95                         | 5                                     |
